# Supplementary material for: Cut-Out Towne-View Whole-Brain 320-Row Four-Dimensional Computed Tomography Angiography for Assessing the Anterior Intracranial Collateral Status: A Retrospective Study
Source: MDPI journal article supplement (doi:10.3390/diagnostics12061336), 2022-05-27
Supplement: s1 [file s1]

**Table S1** Number of volume scanning and radiation dose.

| Case   | Number of VS | Total CTDI vol (mGy) | Total DLP (mGy·cm) |
|--------|--------------|----------------------|--------------------|
| 1      | 25           | 96.6                 | 1545               |
| 2      | 26           | 100.46               | 1606.8             |
| 3      | 23           | 88.91                | 1421.4             |
| 4      | 25           | 96.6                 | 1545               |
| 5      | 27           | 104.32               | 1668.6             |
| 6      | 24           | 92.73                | 1483.2             |
| 7      | 24           | 92.73                | 1483.2             |
| 8      | 24           | 92.73                | 1483.2             |
| 9      | 26           | 100.46               | 1606.8             |
| 10     | 18           | 69.56                | 1112.4             |
| 11     | 26           | 100.46               | 1606.8             |
| 12     | 27           | 104.32               | 1668.6             |
| 13     | 30           | 115.91               | 1854               |
| 14     | 23           | 88.91                | 1421.4             |
| 15     | 25           | 96.6                 | 1545               |
| Median | 25           | 96.6                 | 1545               |

CTDI vol, computed tomography dose index volume; DLP, dose-length product; VS, volume scanning.
