# Supplementary material for: Cut-Out Towne-View Whole-Brain 320-Row Four-Dimensional Computed Tomography Angiography for Assessing the Anterior Intracranial Collateral Status: A Retrospective Study
Source: MDPI journal article supplement (doi:10.3390/diagnostics12061336), 2022-05-27
Supplement: s1 [file s1]

**Table 2.** Evaluation of anterior intracranial collateral status based on unedited AP-view and cut-out Towne-view 4D-CTA images.

| Case | Occlusion | Not edited AP-view 4D-CTA |   |   |   | Cut-out Towne-view 4D-CTA |   |   |   |
|------|-----------|---------------------------|---|---|---|---------------------------|---|---|---|
|      |           | Raters                    |   |   |   | Raters                    |   |   |   |
|      |           | A                         | B | C | D | A                         | B | C | D |
| 1    | MCA       | P                         | I | I | I | I                         | P | I | I |
| 2    | MCA       | P                         | I | I | I | I                         | G | I | I |
| 3    | ICA       | P                         | P | P | G | P                         | P | P | P |
| 4    | MCA       | I                         | I | I | G | I                         | I | I | I |
| 5    | MCA       | P                         | G | P | G | G                         | G | G | G |
| 6    | MCA       | I                         | I | I | I | I                         | I | I | P |
| 7    | ICA       | I                         | I | I | G | G                         | G | G | G |
| 8    | ICA       | G                         | G | G | I | G                         | G | G | G |
| 9    | MCA       | P                         | P | P | I | P                         | I | I | P |
| 10   | MCA       | P                         | G | P | I | I                         | I | I | I |
| 11   | ICA       | G                         | G | G | P | G                         | G | G | G |
| 12   | MCA       | G                         | I | I | I | I                         | I | I | I |
| 13   | ICA       | I                         | I | I | P | I                         | I | I | I |
| 14   | MCA       | I                         | P | P | P | I                         | P | P | I |
| 15   | MCA       | I                         | I | I | I | I                         | I | I | I |

4D-CTA, four-dimensional computed tomography angiography; AP, anteroposterior; G, good; I, intermediate; ICA, internal carotid artery, MCA, middle cerebral artery; P, poor.
