# Supplementary material for: Cut-Out Towne-View Whole-Brain 320-Row Four-Dimensional Computed Tomography Angiography for Assessing the Anterior Intracranial Collateral Status: A Retrospective Study
Source: MDPI journal article supplement (doi:10.3390/diagnostics12061336), 2022-05-27
Supplement: s1 [file s1]

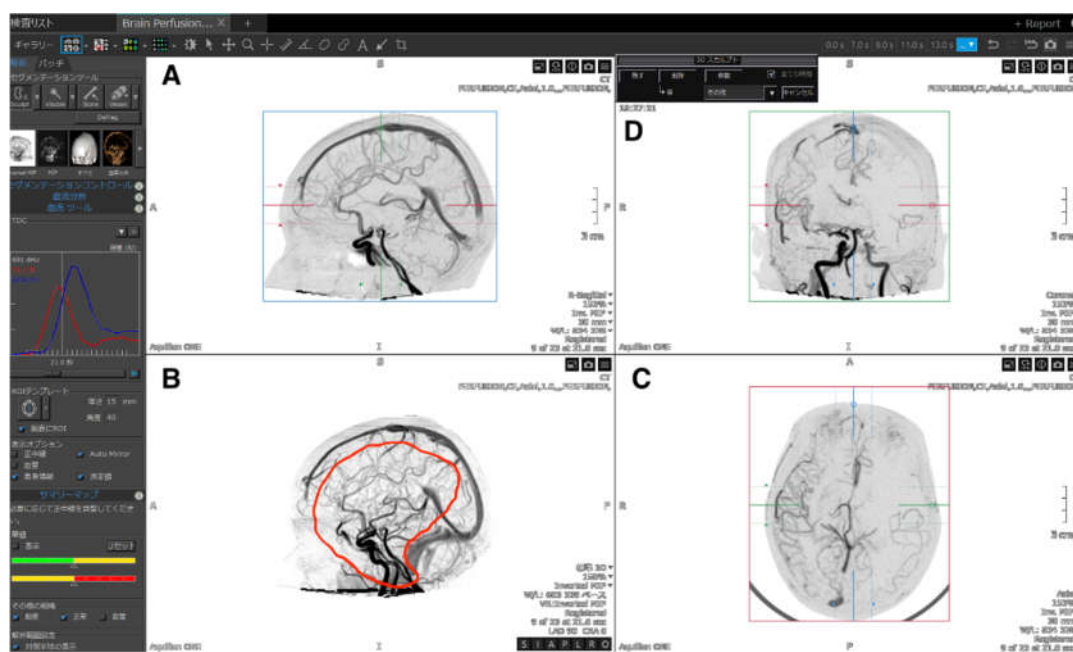

**Figure S1.** A screenshot of cutting out intracranial arteries (B: red line) in the Vitrea workstation.

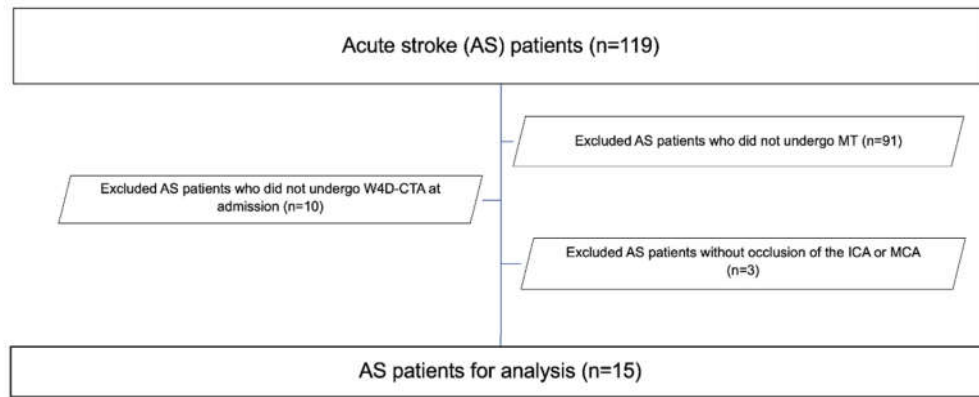

**Figure S2.** Flow chart of patient selection for the analysis. ICA, internal carotid artery; MCA, middle cerebral artery; MT, mechanical thrombectomy; W4D-CTA, whole-brain four-dimensional computed tomography angiography.
